## CORRECTION

# Correction: The impact of public health insurance on health care utilisation, financial protection and health status in low- and middle-income countries: A systematic review

Darius Erlangga, Marc Suhrcke, Shehzad Ali, Karen Bloor

The authors are listed out of order. Please view the correct author order, affiliations, and citation here:

Darius Erlangga<sup>1</sup>, Marc Suhrcke<sup>2,3</sup>, Karen Bloor<sup>1</sup>, Shehzad Ali<sup>1,4</sup>

**1** Department of Health Sciences, University of York, York, England, United Kingdom, **2** Centre of Health Economics, University of York, York, England, United Kingdom, **3** Luxembourg Institute of Socio-economic Research (LISER), Luxembourg, **4** Department of Epidemiology and Biostatistics, Schulich School of Medicine and Dentistry, Western University, London, Ontario, Canada

Erlangga D, Suhrcke M, Bloor K, Ali S (2019) The impact of public health insurance on health care utilisation, financial protection and health status in low- and middle-income countries: A systematic review. PLoS ONE 14(8): e0219731. <https://doi.org/10.1371/journal.pone.0219731>

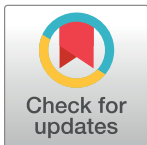

## Reference

1. Erlangga D, Suhrcke M, Ali S, Bloor K (2019) The impact of public health insurance on health care utilisation, financial protection and health status in low- and middle-income countries: A systematic review. PLoS ONE 14(8): e0219731. <https://doi.org/10.1371/journal.pone.0219731> PMID: [31461458](https://pubmed.ncbi.nlm.nih.gov/31461458/)

## OPEN ACCESS

**Citation:** Erlangga D, Suhrcke M, Ali S, Bloor K (2019) Correction: The impact of public health insurance on health care utilisation, financial protection and health status in low- and middle-income countries: A systematic review. PLoS ONE 14(11): e0225237. <https://doi.org/10.1371/journal.pone.0225237>

**Published:** November 7, 2019

**Copyright:** © 2019 Erlangga et al. This is an open access article distributed under the terms of the [Creative Commons Attribution License](https://creativecommons.org/licenses/by/4.0/), which permits unrestricted use, distribution, and reproduction in any medium, provided the original author and source are credited.
